# Supplementary material
Source: Research Square preprint supplement (doi:10.21203/rs.3.rs-9342601/v1)
Supplement: Supplementary file 1 [file 9e72584b338bc99d3c214cf8.xlsx]

## Sheet: SuperClass
SuperClass	Freq	Percent	Metabolite Name
Organic_acids_and_derivatives	541	26.996	(-)-.alpha.-Kainic acid;(.alpha.S,1S,2R)-.alpha.-Amino-2-carboxycyclopropaneacetic acid;(2R)-Amino-2-[2-(4-octylphenyl)ethyl]-1-(dihydrogen phosphate)-1,3-propanediol;(2S)-2,6-diaminohexanamide;(3S,6R,12S)-6-Benzyl-3-butan-2-yl-9-(6,7-dihydroxyoctyl)-1,4,7,10-tetrazabicyclo[10.4.0]hexadecane-2,5,8,11-tetrone;(5aR,10aR)-Octahydrodipyrrolo[1,2-a:1',2'-d]pyrazine-5,10-dione;.alpha.-D-Glucose pentaac…
Lipids_and_lipid_like_molecules	431	21.507	((4r)-4-((3r,5r,9s,10s,12s,13r,14s,17r)-3,12-dihydroxy-10,13-dimethylhexadecahydro-1h-cyclopenta[a]phenanthren-17-yl)pentanoyl)glycylglycine;(+)-Cloprostenol isopropyl ester;(1,4a-Dimethyl-6-methylidene-5-(2-(2-oxo-2,5-dihydrofuran-3-yl)ethyl)decahydronaphthalen-1-yl)methyl 6-O-(carboxyacetyl)hexopyranoside;(10E,15Z)-9,12,13-Trihydroxyoctadeca-10,15-dienoic acid;(17.beta.)-4-Chloro-17-hydroxy-17-…
Organoheterocyclic_compounds	324	16.1677	(-)-Coralyne cation;(-)-Riboflavin;(.+,-.)-Cannabichromene;(1,3-Dioxo-2-azaspiro[4.5]dec-2-yl)acetic acid;(1S,4R)-4-[[(2S,3aS,4S)-2-Butan-2-yl-4-hydroxy-1-oxo-3,3a-dihydro-2H-imidazo[1,2-a]indol-4-yl]methyl]-1-methyl-2,4-dihydro-1H-pyrazino[2,1-b]quinazoline-3,6-dione;(1S,4R)-4-[[(2S,3aS,4S)-4-Hydroxy-2-methyl-1-oxo-3,3a-dihydro-2H-imidazo[1,2-a]indol-4-yl]methyl]-1-methyl-2,4-dihydro-1H-pyrazino…
Benzenoids	216	10.7784	(4-Aminophenyl)phosphonic acid;(R)-.alpha.,.alpha.-Diphenyl-2-pyrrolidinemethanol;.beta.-Phenyl-L-phenylalanine;1'-Acetoxychavicol acetate;1,5-Diphenoxy-9,10-dihydroanthracene-9,10-dione;1-(4-Chlorophenyl)-2-(4-morpholinyl)ethanol;1-Cyclohexyl-N-(3-methylphenyl)-5-oxo-3-pyrrolidinecarboxamide;1-Hydroxy-4-[(4-methoxyphenyl)amino]anthracene-9,10-dione;1-Phenylethanol;1-Piperidinecarboxylic acid, 4-…
Organic_oxygen_compounds	153	7.63473	(1S,3R,4S,5R)-1,3,5-Trihydroxy-4-(((2E)-3-(4-hydroxy-3-methoxyphenyl)prop-2-enoyl)oxy)cyclohexanecarboxylic acid;(3E)-5-(3-Chloro-5-formyl-2,6-dihydroxy-4-methylphenyl)-3-methyl-1-((1S,2R,6R)-1,2,6-trimethyl-3-oxocyclohexyl)pent-3-en-2-yl 2-acetamido-2-deoxyhexopyranoside;(4S,4aR)-4-(Hydroxymethyl)-3,4a,8,8-tetramethyl-4a,5,6,7,8,8a-hexahydronaphthalen-1(4H)-one;.alpha.,.alpha.'-Trehalose 6-phosp…
Phenylpropanoids_and_polyketides	97	4.84032	(11E)-4-((2,6-Dideoxy-4-O-(2-methoxy-6-methylbenzoyl)hexopyranosyl)oxy)-22-hydroxy-15,21a-dimethyl-18,21-dioxo-1,2,3,4,4a,6a,7,8,9,10,12a,15,16,21,21a,21b-hexadecahydro-16a,19-(metheno)benzo[e]naphtho[2,1-m][1,4]dioxacyclopentadecine-14(18H)-carboxylic acid;(1aS,1bS,2S,5aR,6S,6aS)-6-((6-Deoxy-3-O-((2E)-3-(3,4-dihydroxyphenyl)prop-2-enoyl)-.alpha.-L-mannopyranosyl)oxy)-1a-(hydroxymethyl)-1a,1b,2,5…
Undefined	73	3.64271	(Methylenecyclopropyl)acetyl-L-carnitine;1-(1Z-Octadecenyl)-2-(4Z,7Z,10Z,13Z,16Z,19Z-docosahexaenoyl)-sn-glycero-3-phosphoethanolamine;1.alpha.-Methyl-5.alpha.-androstan-3.alpha.-ol-17-one glucuronide;13,14-Epoxyfluprostenol isopropyl ester;16,16-Dimethylprostaglandin D2;2-alahma [dmed-fahfa];2-chloro-n6-cyclopentyladenosine;2-dpahma [dmed-fahfa];2-epahma [dmed-fahfa];2-sdahma [dmed-fahfa];2-sdah…
Nucleosides__nucleotides__and_analogues	63	3.14371	.beta.-Nicotinamide adenine dinucleotide phosphate;.beta.-Nicotinamide mononucleotide;1-Methyladenosine;1-methylguanosine;2',3'-Isopropylideneinosine;2'-Deoxyguanosine;2'-Deoxyinosine;2'-O-Methyladenosine;3'-Amino-3'-deoxythymidine;5-Aminoimidazole-4-carboxamide-1-.beta.D-ribofuranosyl 5'-monophosphate;5-Methyluridine;7-Methylguanosine;Adenosine;Adenosine 2',3'-cyclic phosphate;Adenosine 3'-monop…
Organic_nitrogen_compounds	45	2.24551	(S)-(-)-Anatabine;1,2-Diamino-2-methylpropane;1,5-Pentanediamine;1-O-Hexadecyl-2-deoxy-2-thio-S-acetyl-sn-glyceryl-3-phosphorylcholine;1-Palmitoyl-2-thiopalmitoyl phosphatidylcholine;1-Phenyl-2-decanoylamino-3-morpholino-1-propanol;2,2',2''-(1-Oxa-4,7,10-triazacyclododecane-4,7,10-triyl)triethanol;2,2-Bis[hydroxymethyl]-2,2',2''-nitrilotriethanol;2,8,9-Trimethyl-2,5,8,9-tetraaza-1-phosphabicyclo[…
Alkaloids_and_derivatives	37	1.84631	(1E)-6-Hydroxy-12-(1H-indol-3-ylmethyl)-7-methoxy-4,13,13a-trimethyl-5,6,7,8,12,12a,13,13a,14a,14b-decahydro-3H-cycloundeca[d]oxireno[f]isoindole-9,10(4H,11H)-dione;.alpha.-Ergocryptine;1H-Pyrano[3',4':6,7]indolizino[1,2-b]quinoline-3,14(4H,12H)-dione, 4,11-diethyl-4,9-dihydroxy-, (4S)-;4-Hydroxyphenylmaraviroc;7-Ethyl-10-(4-N-aminopentanoic acid)-1-piperidino)carbonyloxycamptothecin;9-methoxycam…
Lignans__neolignans_and_related_compounds	19	0.948104	(+)-Lyoniresinol 2.alpha.-O-.beta.-D-glucopyranoside;(s,s)-(+)-tetrandrine;.alpha.-Peltatin;2,3-Dehydrosilybin A;3'-O-Desmethyletoposide;3,4-Dimethyl-2,5-bis(3,4,5-trimethoxyphenyl)oxolane;3-(4-((1,3-Dihydroxy-1-(4-hydroxy-3-methoxyphenyl)propan-2-yl)oxy)-3-methoxyphenyl)propyl 6-deoxy-.alpha.-L-mannopyranoside;4-((3R,4S)-4-Hydroxy-4-(4-hydroxy-3-methoxybenzyl)-3-(hydroxymethyl)tetrahydrofuran-2-…
Organosulfur_compounds	4	0.199601	3-(Methylthio)-1-propanol;Acetic acid, 2-[[5-(4-fluorophenyl)-1,3,4-oxadiazol-2-yl]thio]-;(Sulfanylsulfonyl)methane;3-(Dodecylsulfonyl)propanoic acid
Organic acids and derivatives	1	0.0499002	DFLNHa
表1 鉴定代谢物的化学分类统计（SuperClass层级）
父类	数量	百分比
有机酸及其衍生物：27.00%	541	26.996
脂类及类脂分子：21.51%	431	21.507
有机杂环化合物：16.17%	324	16.1677
苯环型化合物：10.78%	216	10.7784
有机氧化合物：7.63%	153	7.63473
苯丙素类及聚酮类：4.84%	97	4.84032
未分类：3.64%	73	3.64271
核苷、核苷酸及其类似物：3.14%	63	3.14371
有机氮化合物：2.25%	45	2.24551
生物碱及其衍生物：1.85%	37	1.84631
木脂素、新木脂素及相关化合物：0.95%	19	0.948104
有机硫化合物：0.20%	4	0.199601
有机酸及其衍生物：0.05%	1	0.0499002
总计	2004	100
Table 1 Chemical classification of identified metabolites at the SuperClass level
Organic acids and derivatives：27.00%	541	26.996
Lipids and lipid like molecules：21.51%	431	21.507
Organoheterocyclic compounds：16.17%	324	16.1677
Benzenoids：10.78%	216	10.7784
Organic oxygen compounds：7.63%	153	7.63473
Phenylpropanoids and polyketides：4.84%	97	4.84032
Undefined：3.64%	73	3.64271
Nucleosides nucleotides and analogues：3.14%	63	3.14371
Organic nitrogen compounds：2.25%	45	2.24551
Alkaloids and derivatives：1.85%	37	1.84631
Lignans neolignans and related compounds：0.95%	19	0.948104
Organosulfur compounds：0.20%	4	0.199601
Organic acids and derivatives：0.05%	1	0.0499002
total	2004	100
